# Supplementary material for: Antimicrobial stewardship in pediatrics: focusing on the challenges clinicians face
Source: PubMed Central journal article supplement (PMC4236642; doi:10.1186/1471-2431-14-212), 2014-08-27
Supplement: 1471-2431-14-212-S1.pdf [file 1471-2431-14-212-S1.pdf]

## Antimicrobial Use Knowledge and Attitudes Survey

We need your help to evaluate antimicrobial stewardship at CHEO. This stewardship involves the optimal use of antimicrobials to improve patient outcomes and minimize harm or side effects. The return of this completed survey will act as your implied consent to your participation.

### 1. What is your role at CHEO?

- Staff physician
- Junior** resident in pediatrics (year 1 or 2)
- Senior** resident/**Fellow** in pediatrics (year 3 or 4)
- Resident from another service (family medicine etc.)
- Medical student
- Other, please specify: \_\_\_\_\_

### 2. Where do you conduct the majority of your clinical work?

- Emergency
- General Pediatrics
- PICU
- NICU
- Outpatient
- Oncology
- Surgery
- Outside of CHEO
- Other, please specify \_\_\_\_\_

### 3. Do you prescribe antimicrobials?

- Yes
- No

### 4. In an average day, how many times do you prescribe antibiotics?

- 0-1 times/day
- 2-4 times/day
- >4 times/day

5. In the past year, have you had any **formal** education of antimicrobial **prescribing** (indication, dosing)? *Exclude informal discussion on rounds but include any specific education sessions.*

- Yes, go to question 5a) and 5b)  
 No, skip to question 6

**5a) IF YES, how many hours of antimicrobial prescribing education have you had in the past year?**

- 1-4 Hours  
 5-7 Hours  
 ≥8 Hours

**5b) Who taught the education session(s)?**

*Please check all that apply.*

- Infectious Disease Physician  
 Pharmacist  
 Pediatrician  
 Other, please specify \_\_\_\_\_

6. In the past year, have you had any **formal** education on antimicrobial **stewardship** (de-escalation, optimization of dosing, relating to antibiograms)? *Exclude informal discussion on rounds but include any specific education sessions.*

- Yes, go to question 6a) and 6b)  
 No, skip to question 7

**6a) IF YES, how many hours of antimicrobial stewardship education have you had in the past year?**

- 1-4 Hours  
 5-7 Hours  
 ≥8 Hours

**6b) Who taught the education session(s)?**

*Please check all that apply.*

- Infectious Disease Physician  
 Pharmacist  
 Pediatrician  
 Other, please specify \_\_\_\_\_

7. **Have you treated any patients in the last year that had resistant bacteria such as (ESBL, MRSA or penicillin resistant *Strep. Pneumoniae*)?**

- Yes  
 No  
 Cannot recall

8. **For each of the following pairs of prescriptions, which contributes MOST to promoting antimicrobial resistance?**

*Circle only one of each pair.*

- a) Lower doses      **or**      Higher doses  
b) Longer courses      **or**      Shorter courses ( $\leq 7$  days)  
c) Ampicillin      **or**      Piperacillin (for equivalent time)  
d) Gentamicin      **or**      Ceftriaxone (for equivalent time)  
e) Azithromycin      **or**      Clarythromycin (for equivalent time)

9. **In your opinion, how many days of antibiotics does it take to change the flora (bacteria) in the gut and pharynx to more resistant bacteria?**

*Please check only one.*

- 3 days  
 6 days  
 9 days  
 Unsure

10. **According to the CHEO 2010 antibiogram, what is the % resistance that was found for the following bacteria?**

- a) Group A streptococcus **resistant to** clindamycin  
 1%  3%  5%  10%  20%  Unsure
- b) Streptococcus pneumonia **resistant to** penicillin  
 1%  3%  5%  10%  20%  Unsure
- c) Escherichia coli (E. coli) **resistant to** gentamicin  
 1%  3%  5%  10%  20%  Unsure

**11. Which one of the following antibiotics would be MOST likely to increase the risk of development of *Clostridium difficile* infection?**

- cefotaxime
- clindamycin
- piperacillin
- vancomycin
- Unsure

***The following are scenarios about principles of antimicrobial stewardship.***

**12. You are asked to write antibiotic orders for a teenager who is having a spinal fusion for insertion of spinal rods. What would you likely recommend for the pre-surgical prophylaxis drug and length of antimicrobial post-operatively?**

- Not applicable to my specialty

**Antibiotic:** \_\_\_\_\_  Unsure

Length of post -operative treatment:

*Please check only one.*

- 24 hours
- 48 hours
- 72 hours
- Unsure

**13. You are asked on rounds about a child who has had 10 days of antibiotics following resection of a cystic adenomatoid malformation with a chest tube in the pleural space. The new medical student asks if this is appropriate or inappropriate use of antimicrobials. What would your likely response be?**

- Appropriate
- Inappropriate
- Unsure

**14. You are admitting a 3 year old child who has received all recommended immunizations to CHEO. The child had cough, fever and chest pain for 4 days. He has a temperature of 38.5°C, a RR of 30/min, a HR of 90/minute and an oxygen saturation of 98% on room air. His radiograph shows a moderate size RML infiltrate. What would be the most narrow spectrum recommended empiric antimicrobial therapy?**

- Not applicable to my specialty
- cefuroxime
- ampicillin or penicillin
- cefuroxime and clindamycin
- Unsure

**14a) The child shows clinical improvement (afebrile after 48 hours and eating) and the blood cultures are negative. What would you likely prescribe as outpatient oral antimicrobial therapy?**

- cefuroxime axetil
- amoxicillin
- Clavulin® (amoxicillin and clavulinate)
- Unsure

**14b) What is the recommended total length of the outpatient prescription assuming no complications?**

- 5 days
- 7 days
- 10 days
- Unsure

**15. A previously healthy 6 year old girl presents to the Emergency Department with burning upon urination for 2 days. She is febrile and is admitted. The urine analysis has > 50 WBC and after 48 hours, the urine culture has *E. coli* that is susceptible to all cephalosporins. The child is now afebrile, has normal urinary tract anatomy and you would like to send her home to complete the antibiotics. Which antibiotic would be the most appropriate as outpatient oral antimicrobial therapy in this case?**

- Not applicable to my specialty

*Please check only one.*

- oral cefuroxime axetil
- oral cephalexin (Keflex)
- oral cefixime
- Unsure

**16. You are asked to write antibiotic orders for a previously well 11 year old child who has clinical appendicitis and is going to the operating room. Which of the following antimicrobials are recommended as first line therapy?**

- Not applicable to my specialty

*Please check only one.*

- cefotaxime and metronidazole
- cefotaxime alone
- gentamicin and clindamycin
- gentamicin and metronidazole
- Unsure

**17. Which one of the following activities do you think contributes MOST to bacterial resistance worldwide?**

*Please check only one.*

- Use of antibiotics in animals
- Use of antibiotics in humans
- Transmission of resistant bacteria in hospitals
- Other, please specify \_\_\_\_\_

**18. In making antimicrobial decisions on individual patients who or what do you rely on the MOST when you have questions?**

*Please check only one.*

- Staff/Peer recommendation / Senior resident recommendation
- Pharmacist
- CHEO / HSC manual / Lexicomp / Sanford guide / Red Book
- Other, please specify \_\_\_\_\_

**19. When prescribing an antibiotic for a patient, which type of bacterial resistance rates or resistance information do you think about before prescribing the antibiotic?**

*Please check only one.*

- Local rates
- National rates
- World reports on resistance
- Other, please specify \_\_\_\_\_
- None

**20. Which of the following parameters would likely have the GREATEST impact in decreasing antimicrobial use in the unit you work?**

*Please check only one.*

- Discontinuing antimicrobials if there is no documented infection
- Decreasing the length of antimicrobial therapy
- Early conversion from intravenous to oral therapy
- Narrow spectrum antibiotics versus broad spectrum antibiotics
- Other, please specify \_\_\_\_\_

**21. In terms of influencing what you prescribe, to what extent do you feel the infectious disease service serves as a role model for stewardship on hospital wards?**

*Please check only one.*

- Not at all
- Some of the time
- Most of the time
- All the time

**22. Which ONE of the following tasks do you consider being MOST DIFFICULT to do with respect to modifying antimicrobial therapy?**

*Please check only one.*

- Discontinuing antimicrobials when there is no documented infection
- Decreasing the length of antimicrobial therapy
- Early conversion from intravenous to oral therapy
- Narrow spectrum antibiotics versus broad spectrum antibiotics

Thank you for your participation!
